# Supplementary material for: Validation of an Independent Web-Based Tool for Measuring Visual Acuity and Refractive Error (the Manifest versus Online Refractive Evaluation Trial): Prospective Open-Label Noninferiority Clinical Trial
Source: PubMed Central journal article supplement (PMC6874802; doi:10.2196/14808), 2019-11-08
Supplement: jmir_v21i11e14808_app4.pdf [file jmir_v21i11e14808_app4.pdf]

| <b>Supplementary data. Refractive error and visual acuity measured in the myopic and hyperopic participants. (1<sup>st</sup> &amp; 2<sup>nd</sup> generation algorithm combined)</b> |                                  |                                |            |                         |       |                      |
|--------------------------------------------------------------------------------------------------------------------------------------------------------------------------------------|----------------------------------|--------------------------------|------------|-------------------------|-------|----------------------|
|                                                                                                                                                                                      | Manifest refraction <sup>a</sup> | Online refraction <sup>a</sup> | Difference | 95% confidence interval |       | P-value <sup>b</sup> |
|                                                                                                                                                                                      |                                  |                                |            | lower                   | upper |                      |
| <b>Myopic participants</b>                                                                                                                                                           |                                  |                                |            |                         |       |                      |
| Vector (D) <sup>d</sup>                                                                                                                                                              | 1.70±1.60                        | 1.58±1.30                      | 0.12       | -0.02                   | 0.26  | 0.08                 |
| Spherical equivalent (D)                                                                                                                                                             | -1.65±1.62                       | -1.47±1.31                     | -0.18      | -0.30                   | -0.06 |                      |
| Spherical power (D)                                                                                                                                                                  | -1.43±1.55                       | -1.24±1.40                     | -0.19      | -0.33                   | -0.06 |                      |
| Cylindrical power (D)                                                                                                                                                                | -0.44±0.50                       | -0.47±1.05                     | 0.02       | -0.15                   | 0.19  |                      |
| Cylindrical axis (degrees)                                                                                                                                                           | 97±57                            | 85±54                          | 12         | 5                       | 28    |                      |
| CDVA LogMAR <sup>e</sup>                                                                                                                                                             | -0.13±0.06                       | -0.02±0.18                     | -0.11      | -0.14                   | -0.08 | <0.01                |
| CDVA Snellen <sup>e</sup>                                                                                                                                                            | 1.37±0.19                        | 1.12±0.35                      | 0.25       | 0.20                    | 0.30  |                      |
| <b>Hyperopic participants</b>                                                                                                                                                        |                                  |                                |            |                         |       |                      |
| Vector (D) <sup>d</sup>                                                                                                                                                              | 0.71±0.78                        | 0.22±0.38                      | 0.48       | 0.21                    | 0.75  | <0.01                |
| Spherical equivalent (D)                                                                                                                                                             | 0.66±0.78                        | 0.02±0.41                      | 0.63       | 0.31                    | 0.95  |                      |
| Spherical power (D)                                                                                                                                                                  | 0.84±0.89                        | 0.10±0.43                      | 0.73       | 0.38                    | 1.09  |                      |
| Cylindrical power (D)                                                                                                                                                                | -0.36±0.38                       | -0.16±0.27                     | -0.20      | -0.33                   | -0.08 |                      |
| Cylindrical axis (degrees)                                                                                                                                                           | 85±64                            | 66±38                          | 19         | -53                     | 91    |                      |
| CDVA LogMAR <sup>e</sup>                                                                                                                                                             | -0.13±0.06                       | -0.07±0.12                     | -0.06      | -0.10                   | -0.02 | <0.01                |
| CDVA Snellen <sup>e</sup>                                                                                                                                                            | 1.37±0.18                        | 1.22±0.27                      | 0.15       | 0.06                    | 0.25  |                      |
| CDVA, corrected distance visual acuity; LogMAR, logarithm of the minimum angle of resolution; Snellen, decimal visual acuity.                                                        |                                  |                                |            |                         |       |                      |
| <sup>a</sup> Unless otherwise specified reported as mean ±standard deviation.                                                                                                        |                                  |                                |            |                         |       |                      |
| <sup>b</sup> Paired-sample Student's <i>t</i> -test was performed for predefined primary and secondary outcome parameters only.                                                      |                                  |                                |            |                         |       |                      |
| <sup>c</sup> Generalized estimates equation model to statistically correct for the inclusion two eyes of one subject, age, and sex.                                                  |                                  |                                |            |                         |       |                      |
| <sup>d</sup> Spherical and cylindrical power and axes were translated into vectors using Fourier analysis.                                                                           |                                  |                                |            |                         |       |                      |
| <sup>e</sup> Assessed with either the manifest or online achieved correction                                                                                                         |                                  |                                |            |                         |       |                      |
